# Supplementary material for: Dual Role of Mitogen-Activated Protein Kinase 8 Interacting Protein-1 in Inflammasome and Pancreatic β-Cell Function
Source: MDPI journal article supplement (doi:10.3390/ijms24054990), 2023-03-05
Supplement: s1 [file s1]

## Supplementary Figures

**Figure S1 (replicate 1):**

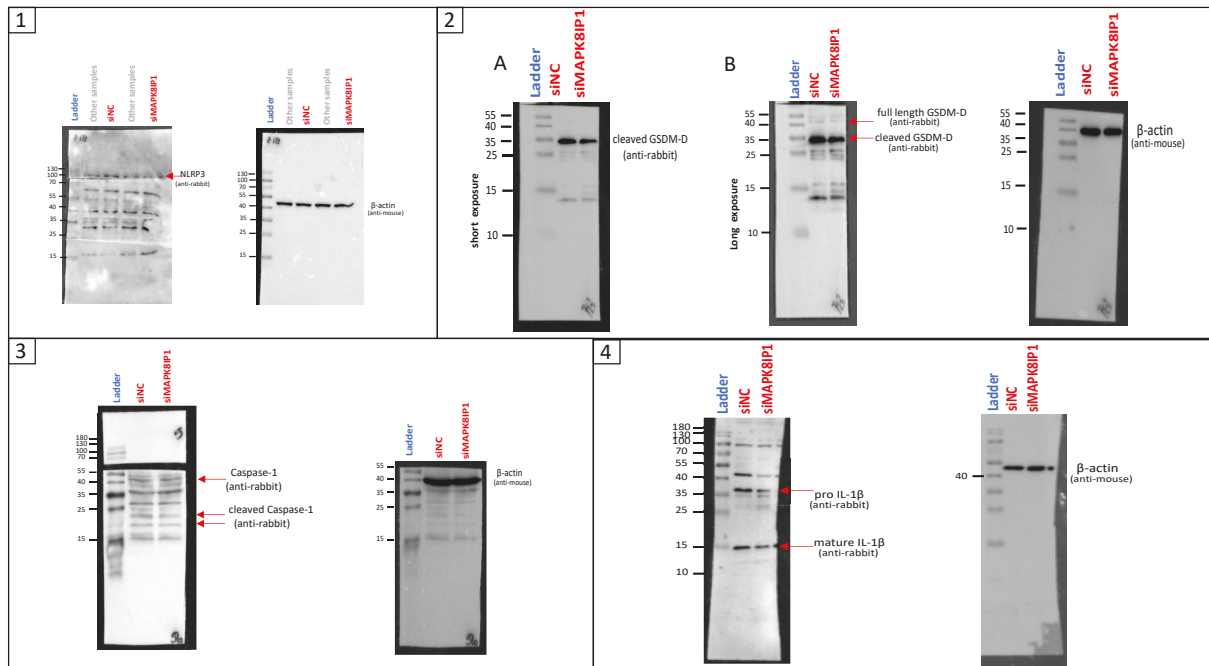

**Figure S1. (replicate 1)** The full-length western blot expressions after *Mapk8ip1* silencing. Western blot was conducted for (1) NLRP3, (2) GSDM-D (full length and cleaved N-terminal fragment) after (A) short exposure time and (B) long exposure time, (3) CASPASE-1 (pro-caspase-1 and active cleaved caspase-1) and (4) IL-1 $\beta$  (pro and mature IL-1 $\beta$ ).  $\beta$ -actin was used as endogenous control. The cropped blots from membranes 1, 2, 3 and 4 were used as representative figures in the main article.

**Figure S2 (replicate 2):**

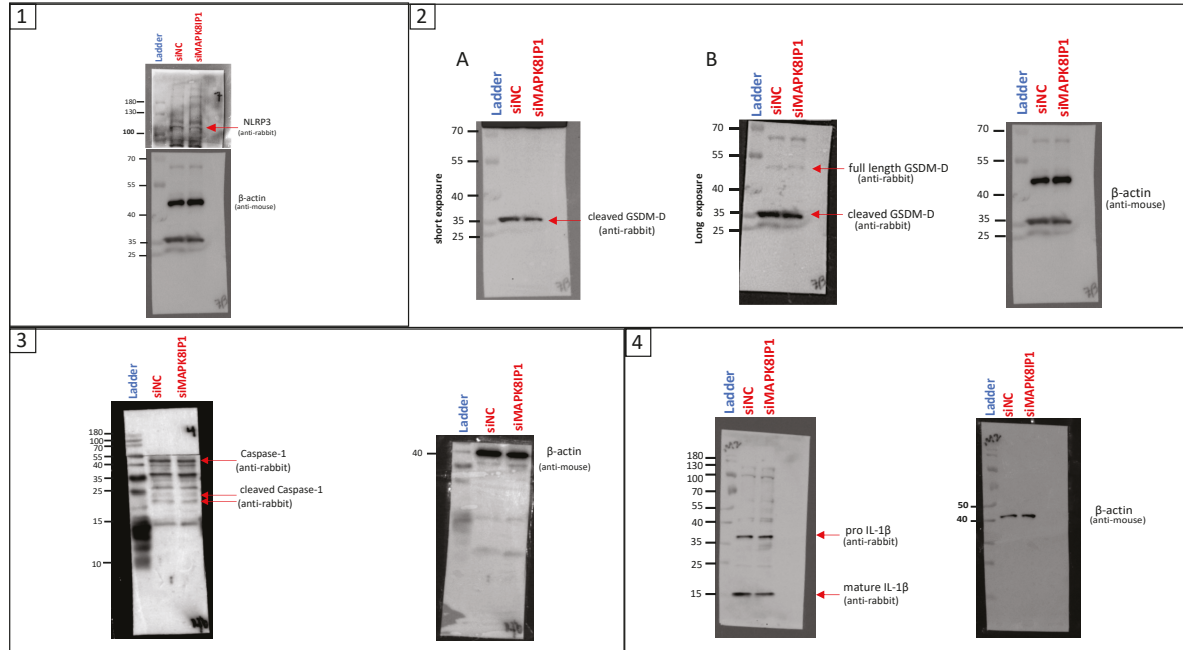

**Figure S2. (replicate 2)** The full-length western blot expressions after *Mapk8ip1* silencing. Western blot was conducted for **(1)** NLRP3, **(2)** GSDM-D (full length and cleaved N-terminal fragment) after (A) short exposure time and (B) long exposure time, **(3)** CASPASE-1 (pro-caspase-1 and active cleaved caspase-1) and **(4)** IL-1 $\beta$  (pro and mature IL-1 $\beta$ ).  $\beta$ -actin was used as endogenous control.

**Figure S3 (replicate 3):**

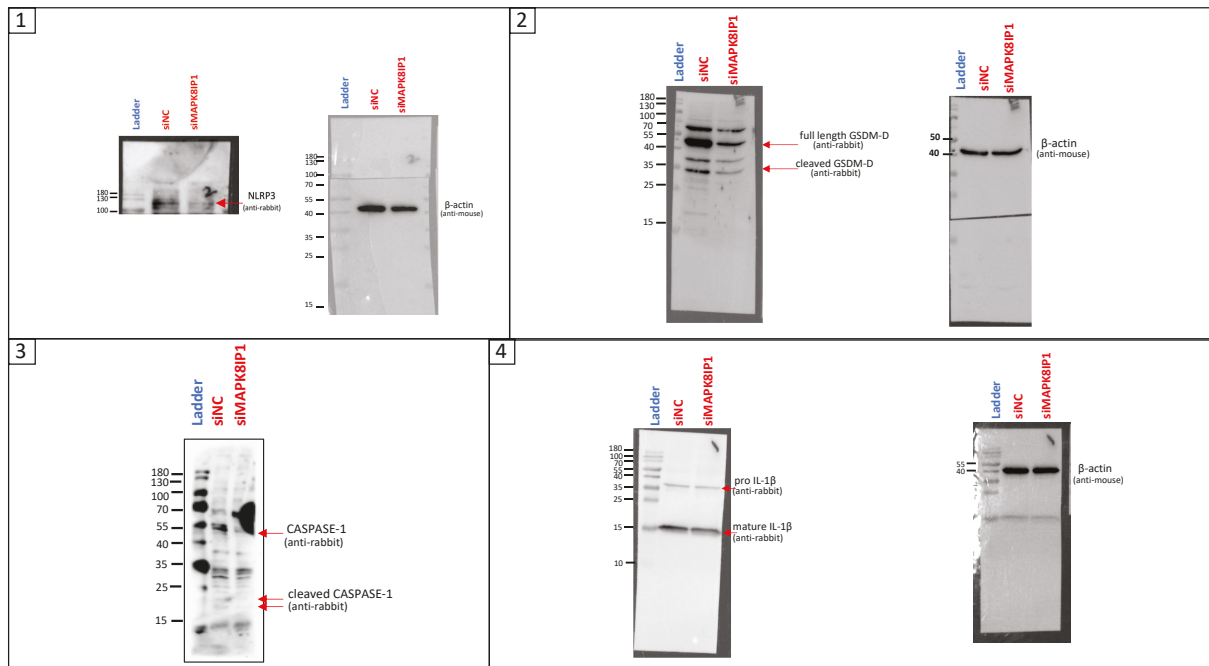

**Figure S3. (replicate 3)** The full-length western blot expressions after *Mapk8ip1* silencing. Western blot was conducted for (1) NLRP3, (2) GSDM-D (full length and cleaved N-terminal fragment), (3) CASPASE-1 (pro-caspase-1 and active cleaved caspase-1) and (4) IL-1β (pro and mature IL-1β). β-actin was used as endogenous control.

**Figure S4 (replicate 4):**

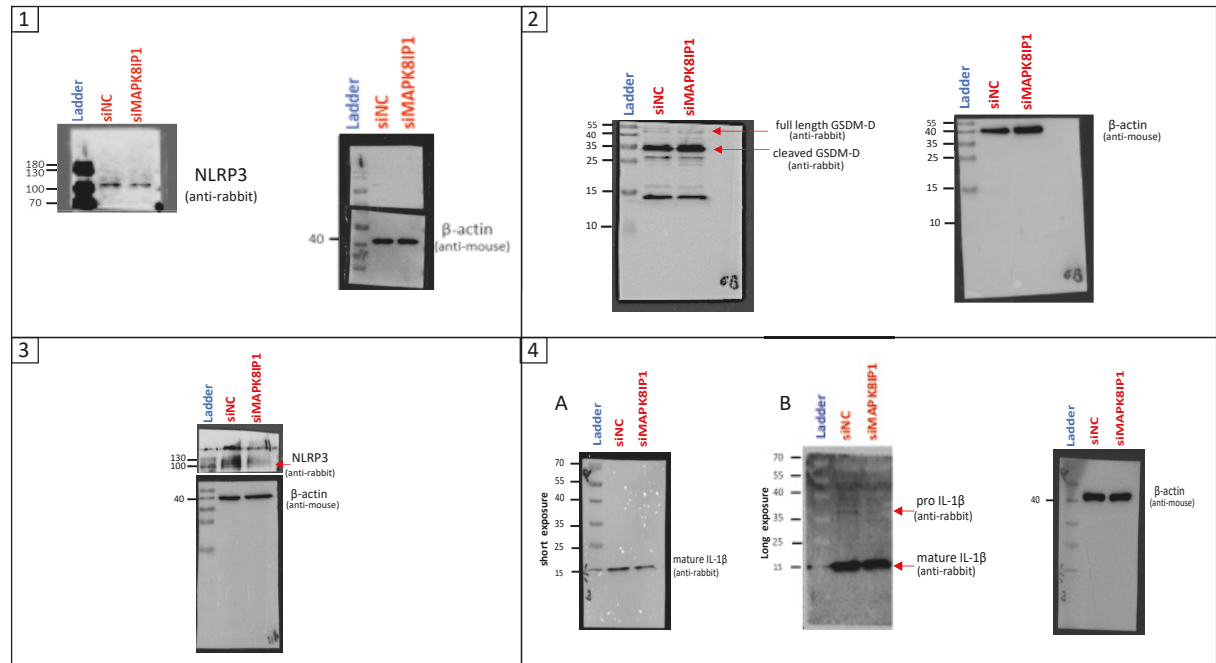

**Figure S4. (replicate 4)** The full-length western blot expressions after *Mapk8ip1* silencing. Western blot was conducted for (1) NLRP3, (2) GSDM-D (full length and cleaved N-terminal fragment), (3) NLRP3 and (4) IL-1 $\beta$  (pro and mature IL-1 $\beta$ ) after (A) short exposure time and (B) long exposure time.  $\beta$ -actin was used as endogenous control.



**Figure S5 (replicate 1):**

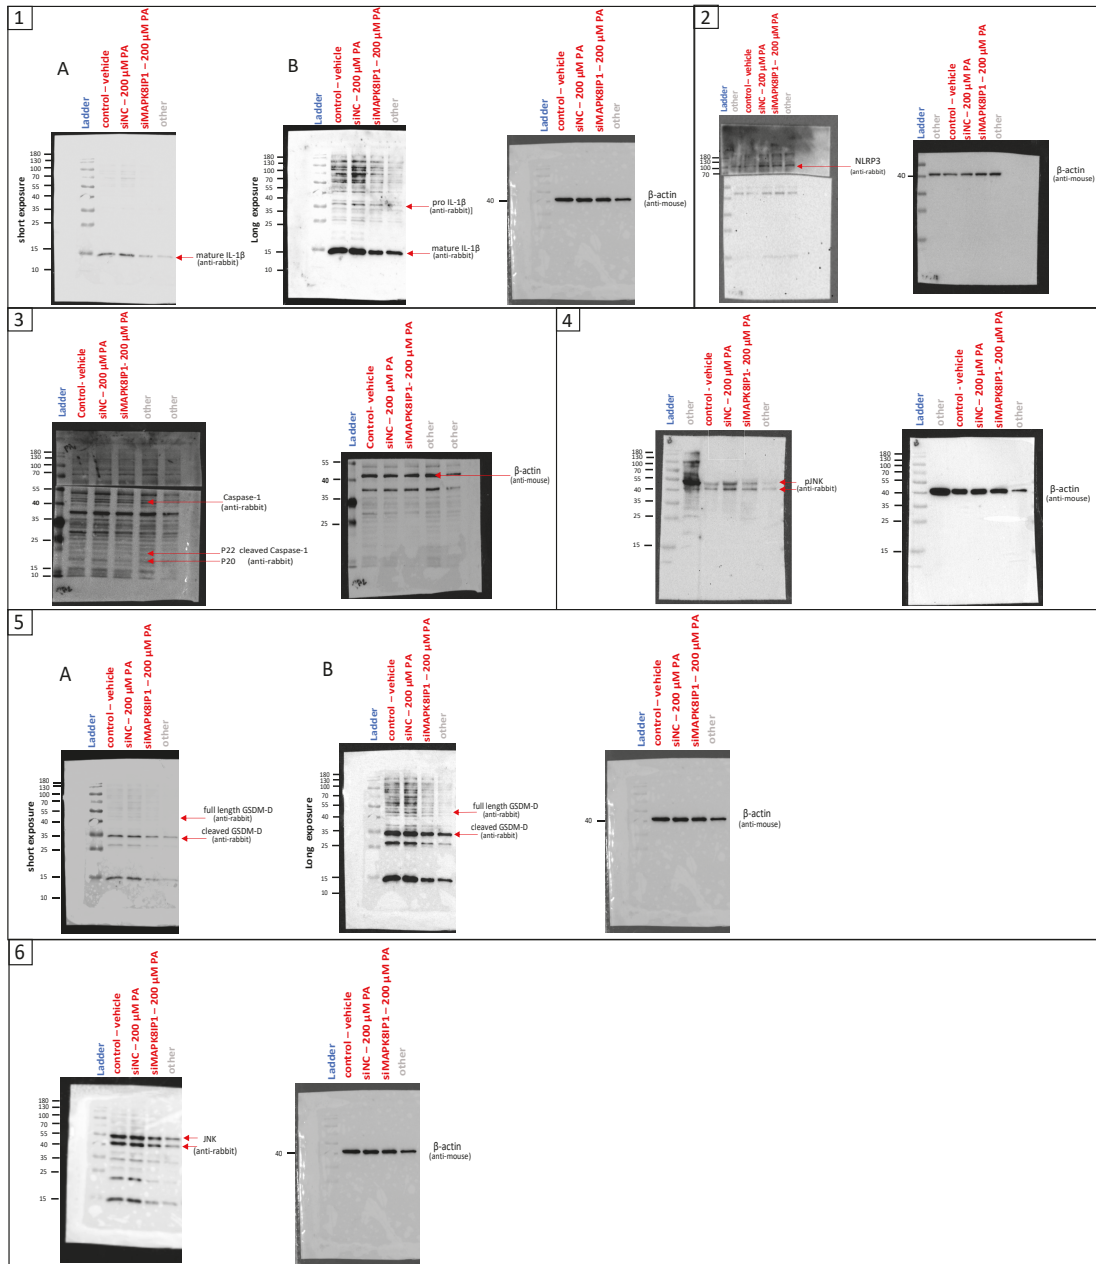

**Figure S5. (replicate 1)** The full-length western blot expressions showing the impact of *Mapk8ip1* silencing on inflammasome activation using LPS/PA-BSA. Western blot was conducted for (1) IL-1β (pro and mature IL-1β) after (A) short exposure time and (B) long exposure time, (2) NLRP3, (3) CASPASE-1 (pro-caspase-1 and active cleaved caspase-1), (4) pJNK, (5) GSDM-D (full length and cleaved N-terminal fragment) after (A) short exposure time and (B) long exposure time and (6) JNK. β-actin was used as endogenous control.

**Figure S6 (replicate 2):**

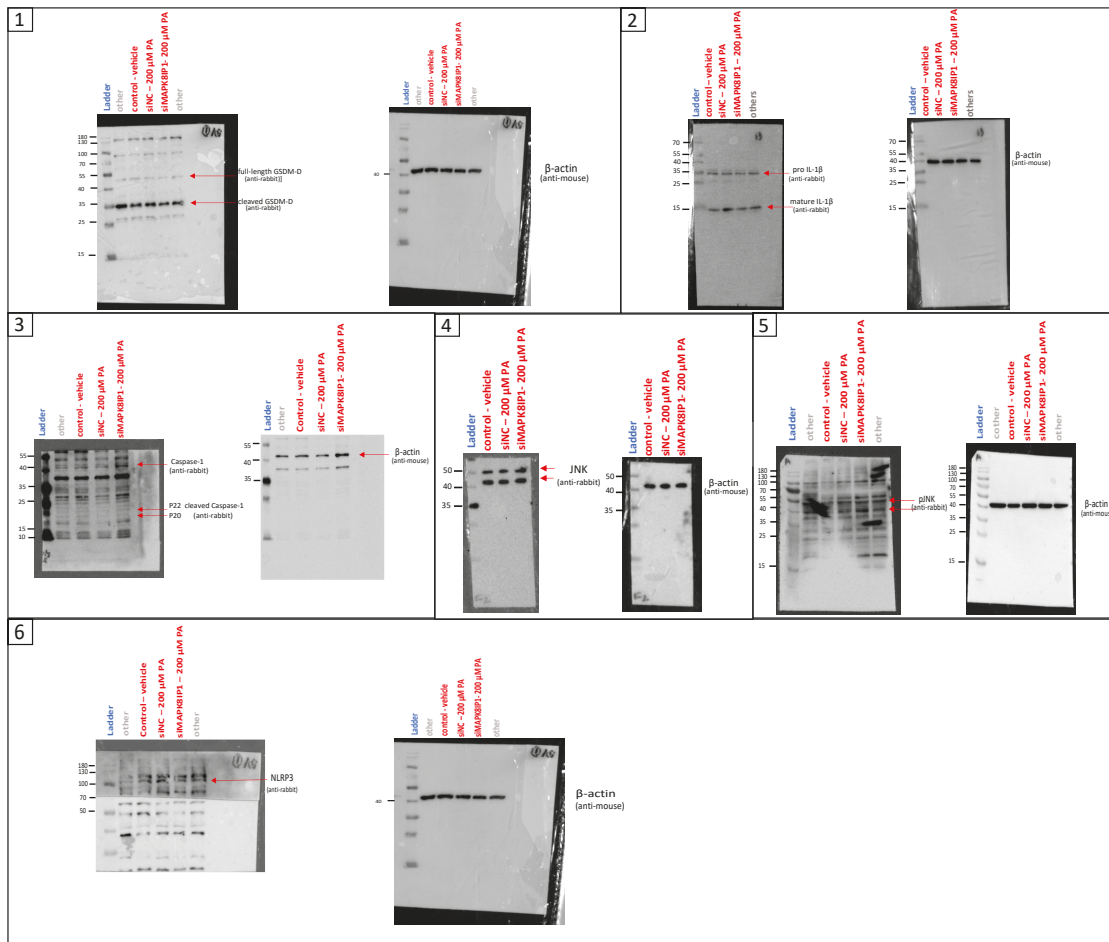

**Figure S6. (replicate 2)** The full-length western blot expressions showing the impact of *Mapk8ip1* silencing on inflammasome activation using LPS/PA-BSA. Western blot was conducted for (1) GSDM-D (full length and cleaved N-terminal fragment) (2) IL-1 $\beta$  (pro and mature IL-1 $\beta$ ), (3) CASPASE-1 (pro-caspase-1 and active cleaved caspase-1), (4) JNK, (5) pJNK and (6) NLRP3.  $\beta$ -actin was used as endogenous control.

**Figure S7 (replicate 3):**

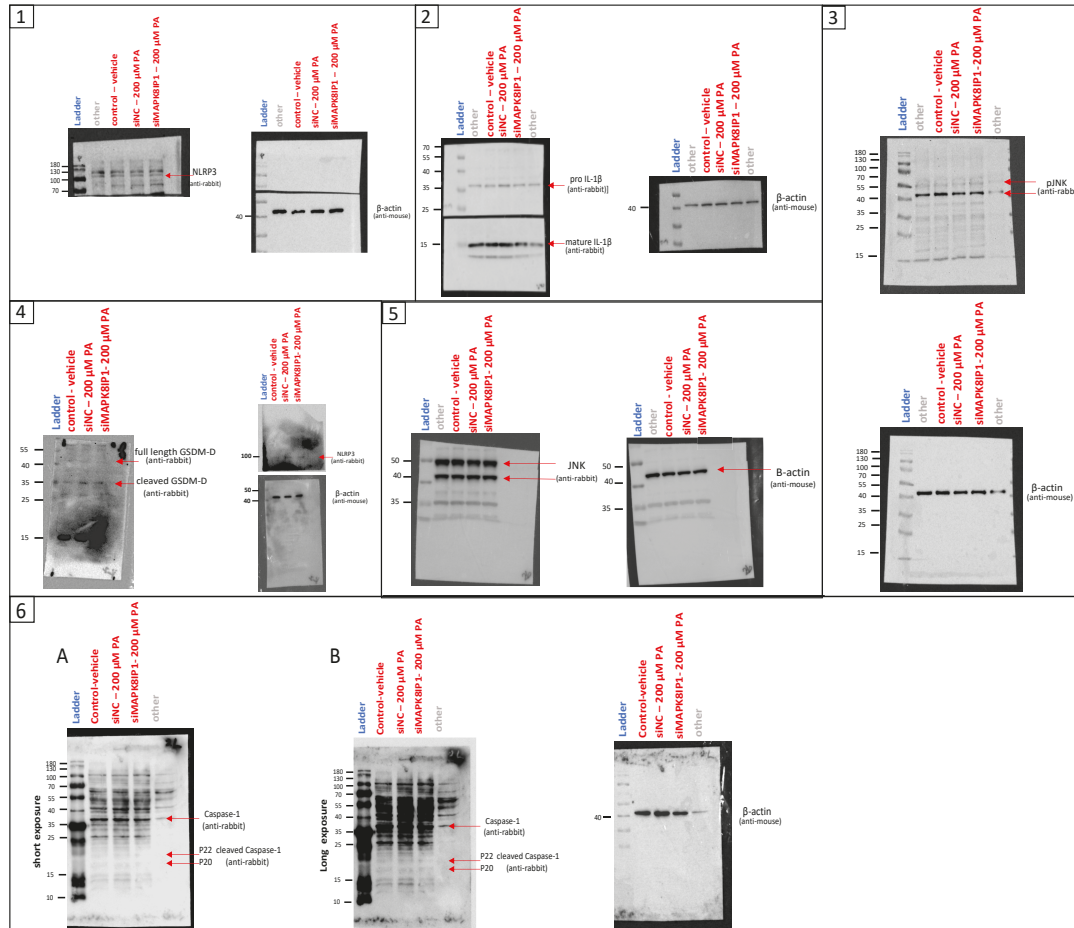

**Figure S7. (replicate 3)** The full-length western blot expressions showing the impact of *Mapk8ip1* silencing on inflammasome activation using LPS/PA-BSA. Western blot was conducted for (1) NLRP3, (2) IL-1β (pro and mature IL-1β), (3) pJNK, (4) GSDM-D (full length and cleaved N-terminal fragment) and NLRP3, (5) JNK and (6) CASPASE-1 (pro-caspase-1 and active cleaved caspase-1) after (A) short exposure time and (B) long exposure time. β-actin was used as endogenous control.
